# Supplementary material for: Eight Zn(ii) and Cd(ii) complexes based on the aromatic C-centered triangular multicarboxylate and N-donor mixed ligands
Source: Royal Society of Chemistry journal article supplement (doi:10.1039/c6ra10144e), 2016-01-01
Supplement: c6ra10144e1.pdf [file c6ra10144e1.pdf]

Supporting information for

**Eight Zn(II) and Cd(II) complexes based on the aromatic C-centered triangular multicarboxylate and N-donor mixed ligands**

**Aiyang Nie,<sup>a</sup> Yongli Tong,<sup>a</sup> Hu Zhou,<sup>b</sup> Lingling Cao,<sup>a</sup> Hui Yu<sup>a</sup>, Chao Shi<sup>a</sup> and Aihua Yuan<sup>\*a</sup>**

*<sup>a</sup> School of Biology and Chemical Engineering, Jiangsu University of Science and Technology, Zhenjiang 212003, P. R. China. Fax: +86 511 85635850; Tel: +86 511 85639001; E-mail: aihua.yuan@just.edu.cn.*

*<sup>b</sup> School of Material Science and Engineering, Jiangsu University of Science and Technology, Zhenjiang 212003, P. R. China.*

**Table S1.** Crystallographic data and structural refinement details for **1-8**.

| Complexes                                                                             | <b>1</b>                                                                          | <b>2</b>                                                                       | <b>3</b>                                                                       | <b>4</b>                                                                       |
|---------------------------------------------------------------------------------------|-----------------------------------------------------------------------------------|--------------------------------------------------------------------------------|--------------------------------------------------------------------------------|--------------------------------------------------------------------------------|
| Formula                                                                               | C <sub>143</sub> H <sub>123</sub> O <sub>33</sub> N <sub>13</sub> Zn <sub>8</sub> | C <sub>37</sub> H <sub>29</sub> N <sub>3</sub> O <sub>9</sub> Zn <sub>2</sub>  | C <sub>37</sub> H <sub>27</sub> N <sub>3</sub> O <sub>9</sub> Zn <sub>2</sub>  | C <sub>56</sub> H <sub>40</sub> N <sub>2</sub> O <sub>16</sub> Zn <sub>3</sub> |
| Formula weight                                                                        | 3074.50                                                                           | 790.37                                                                         | 788.36                                                                         | 1193.01                                                                        |
| Crystal system                                                                        | monoclinic                                                                        | monoclinic                                                                     | monoclinic                                                                     | triclinic                                                                      |
| Space group                                                                           | <i>P</i> 2 <sub>1</sub> / <i>c</i>                                                | <i>P</i> 2 <sub>1</sub> / <i>c</i>                                             | <i>P</i> 2 <sub>1</sub> / <i>c</i>                                             | <i>P</i> $\bar{1}$                                                             |
| <i>a</i> (Å)                                                                          | 11.0265(16)                                                                       | 11.4877(12)                                                                    | 14.3130(18)                                                                    | 9.405(3)                                                                       |
| <i>b</i> (Å)                                                                          | 13.461(2)                                                                         | 14.3195(14)                                                                    | 23.533(2)                                                                      | 13.541(3)                                                                      |
| <i>c</i> (Å)                                                                          | 25.8071(19)                                                                       | 24.3237(15)                                                                    | 10.1409(13)                                                                    | 14.045(2)                                                                      |
| $\alpha$ (°)                                                                          | 90.00                                                                             | 90.00                                                                          | 90.00                                                                          | 116.75(2)                                                                      |
| $\beta$ (°)                                                                           | 98.093(2)                                                                         | 99.615(2)                                                                      | 100.919(2)                                                                     | 90.123(10)                                                                     |
| $\gamma$ (°)                                                                          | 90.00                                                                             | 90.00                                                                          | 90.00                                                                          | 106.568(18)                                                                    |
| <i>V</i> (Å <sup>3</sup> )                                                            | 3792.3(8)                                                                         | 3945.0(6)                                                                      | 3354.0(7)                                                                      | 1513.0(6)                                                                      |
| <i>Z</i>                                                                              | 1                                                                                 | 4                                                                              | 4                                                                              | 1                                                                              |
| <i>D</i> <sub>calc</sub> (g·cm <sup>-3</sup> )                                        | 1.346                                                                             | 1.331                                                                          | 1.561                                                                          | 1.309                                                                          |
| $\mu$ (mm <sup>-1</sup> )                                                             | 1.317                                                                             | 1.269                                                                          | 1.492                                                                          | 1.243                                                                          |
| <i>F</i> (000)                                                                        | 1576                                                                              | 1616                                                                           | 1608                                                                           | 608                                                                            |
| <i>R</i> <sub>1</sub> , $\omega R$ <sub>2</sub> [ <i>I</i> > 2 $\sigma$ ( <i>I</i> )] | 0.0553, 0.1463                                                                    | 0.0402, 0.1054                                                                 | 0.0361, 0.1058                                                                 | 0.0404, 0.1118                                                                 |
| <i>R</i> <sub>1</sub> , $\omega R$ <sub>2</sub> [all data]                            | 0.0691, 0.1485                                                                    | 0.0844, 0.1248                                                                 | 0.0511, 0.1087                                                                 | 0.0712, 0.1186                                                                 |
| GOF                                                                                   | 1.019                                                                             | 1.052                                                                          | 1.012                                                                          | 1.004                                                                          |
| Complexes                                                                             | <b>5</b>                                                                          | <b>6</b>                                                                       | <b>7</b>                                                                       | <b>8</b>                                                                       |
| Formula                                                                               | C <sub>50</sub> H <sub>44</sub> Cd <sub>3</sub> N <sub>2</sub> O <sub>16</sub>    | C <sub>54</sub> H <sub>34</sub> Cd <sub>3</sub> N <sub>2</sub> O <sub>12</sub> | C <sub>56</sub> H <sub>36</sub> Cd <sub>3</sub> N <sub>2</sub> O <sub>12</sub> | C <sub>70</sub> H <sub>56</sub> N <sub>6</sub> O <sub>16</sub> Cd <sub>3</sub> |
| Formula weight                                                                        | 1266.07                                                                           | 1240.03                                                                        | 1266.07                                                                        | 1574.40                                                                        |
| Crystal system                                                                        | monoclinic                                                                        | monoclinic                                                                     | triclinic                                                                      | triclinic                                                                      |
| Space group                                                                           | <i>P</i> <sub>2</sub> / <i>n</i>                                                  | <i>P</i> <sub>2</sub> / <i>n</i>                                               | <i>P</i> $\bar{1}$                                                             | <i>P</i> $\bar{1}$                                                             |
| <i>a</i> (Å)                                                                          | 14.054(3)                                                                         | 13.3405(13)                                                                    | 9.3767(15)                                                                     | 13.179(2)                                                                      |
| <i>b</i> (Å)                                                                          | 25.465(2)                                                                         | 9.3835(12)                                                                     |                                                                                | 13.630(2)                                                                      |
| <i>c</i> (Å)                                                                          | 17.291(3)                                                                         | 23.3073(13)                                                                    | 14.0167(14)                                                                    | 13.915(2)                                                                      |
| $\alpha$ (°)                                                                          | 90.00                                                                             | 90.00                                                                          | 63.182(3)                                                                      | 64.597(3)                                                                      |
| $\beta$ (°)                                                                           | 90.00                                                                             | 90.00                                                                          | 89.797(3)                                                                      | 79.867(4)                                                                      |
| $\gamma$ (°)                                                                          | 102.384(3)                                                                        | 94.221(3)                                                                      | 73.3358(14)                                                                    | 64.592(3)                                                                      |
| <i>V</i> (Å <sup>3</sup> )                                                            | 6044.0(17)                                                                        | 2909.7(5)                                                                      | 1503.2(3)                                                                      | 2039.4(6)                                                                      |
| <i>Z</i>                                                                              | 4                                                                                 | 2                                                                              | 1                                                                              | 1                                                                              |
| <i>D</i> <sub>calc</sub> (g·cm <sup>-3</sup> )                                        | 1.391                                                                             | 1.415                                                                          | 1.399                                                                          | 1.282                                                                          |
| $\mu$ (mm <sup>-1</sup> )                                                             | 1.105                                                                             | 1.142                                                                          | 1.107                                                                          | 0.83                                                                           |
| <i>F</i> (000)                                                                        | 2520                                                                              | 1224                                                                           | 626                                                                            | 790                                                                            |
| <i>R</i> <sub>1</sub> , $\omega R$ <sub>2</sub> [ <i>I</i> > 2 $\sigma$ ( <i>I</i> )] | 0.0437, 0.1035                                                                    | 0.0462, 0.1262                                                                 | 0.0422, 0.0993                                                                 | 0.0532, 0.1116                                                                 |
| <i>R</i> <sub>1</sub> , $\omega R$ <sub>2</sub> [all data]                            | 0.0568, 0.1058                                                                    | 0.0492, 0.1274                                                                 | 0.0524, 0.1030                                                                 | 0.0669, 0.1154                                                                 |
| GOF                                                                                   | 1.039                                                                             | 0.887                                                                          | 1.056                                                                          | 1.060                                                                          |

**Table S2.** Selected bond lengths ( $\text{\AA}$ ) and angles ( $^\circ$ ) for **1-8**.

| <b>1</b>                 |            | <b>2</b>                              |            | <b>3</b>                                |            | <b>4</b>                                |            |
|--------------------------|------------|---------------------------------------|------------|-----------------------------------------|------------|-----------------------------------------|------------|
| Zn1-O2                   | 2.199(3)   | Zn1-N1                                | 2.198(3)   | Zn1-N1                                  | 2.170(3)   | Zn1-N1                                  | 2.298(3)   |
| Zn1-O4                   | 1.935(3)   | Zn1-N2                                | 2.129(3)   | Zn1-N2                                  | 2.091(3)   | Zn1-O1                                  | 2.432(3)   |
| Zn1-O6 <sup>vi</sup>     | 1.935(2)   | Zn1-O1                                | 2.082(2)   | Zn1-N3                                  | 2.155(3)   | Zn1-O2                                  | 2.438(3)   |
| Zn1-O7 <sup>v</sup>      | 2.111(3)   | Zn1-O1 <sup>i</sup>                   | 2.117(3)   | Zn1-O1                                  | 1.916(2)   | Zn1-O2 <sup>ii</sup>                    | 2.468(3)   |
| Zn2-O1                   | 2.119(3)   | Zn1-O2                                | 2.119(3)   | Zn1-O1 <sup>w</sup>                     | 2.079(2)   | Zn1-O3 <sup>v</sup>                     | 2.204(3)   |
| Zn2-O3                   | 2.134(3)   | Zn1-O4 <sup>iv</sup>                  | 2.160(3)   | Zn1-O7 <sup>iii</sup>                   | 2.153(2)   | Zn1-O6 <sup>vi</sup>                    | 2.299(3)   |
| Zn2-O7                   | 2.077(3)   | Zn2-O1                                | 1.992(3)   | Zn2-O1                                  | 1.930(2)   | Zn2-O1                                  | 2.300(3)   |
| Zn2-O7 <sup>v</sup>      | 2.111(3)   | Zn2-O3                                | 2.040(2)   | Zn2-O2                                  | 2.043(2)   | Zn2-O1 <sup>viii</sup>                  | 2.300(3)   |
| Zn2-N1                   | 2.122(3)   | Zn2-O5 <sup>iv</sup>                  | 1.958(3)   | N1-Zn1-N2                               | 74.65(11)  | Zn2-O4 <sup>v</sup>                     | 2.245(3)   |
| Zn2-N2                   | 2.151(3)   | Zn2-O7 <sup>v</sup>                   | 1.932(3)   | N1-Zn1-N3                               | 149.90(11) | Zn2-O4 <sup>vii</sup>                   | 2.245(3)   |
| O2-Zn1-O4                | 106.97(12) | N1-Zn1-N2                             | 78.98(12)  | N1-Zn1-O1                               | 105.95(10) | Zn2-O5 <sup>ix</sup>                    | 2.326(3)   |
| O2-Zn1-O6 <sup>vi</sup>  | 107.58(11) | N1-Zn1-O1                             | 99.75(12)  | N1-Zn1-O1 <sup>w</sup>                  | 88.79(10)  | Zn2-O5 <sup>vi</sup>                    | 2.326(3)   |
| O2-Zn1-O7                | 111.13(11) | N1-Zn1-O1 <sup>i</sup>                | 100.51(12) | N1-Zn1-O7 <sup>iii</sup>                | 88.23(10)  | N1-Zn1-O1                               | 103.63(12) |
| O4-Zn1-O6 <sup>vi</sup>  | 117.93(11) | N1-Zn1-O2                             | 74.26(11)  | N2-Zn1-N3                               | 75.25(11)  | N1-Zn1-O2                               | 89.07(11)  |
| O4-Zn1-O7                | 106.27(11) | N1-Zn1-O4 <sup>iv</sup>               | 166.74(11) | N2-Zn1-O1                               | 176.72(10) | N1-Zn1-O3 <sup>v</sup>                  | 139.79(13) |
| O6 <sup>vi</sup> -Zn1-O7 | 106.97(11) | N2-Zn1-O1                             | 178.14(12) | N2-Zn1-O1 <sup>w</sup>                  | 91.09(10)  | N1-Zn1-O6 <sup>vi</sup>                 | 83.09(11)  |
| N1-Zn2-N2                | 77.87(13)  | N2-Zn1-O1 <sup>i</sup>                | 96.65(11)  | N2-Zn1-O7 <sup>iii</sup>                | 86.79(10)  | O1-Zn1-O2                               | 56.22(10)  |
| N1-Zn2-O1                | 87.69(11)  | N2-Zn1-O2                             | 94.83(11)  | N3-Zn1-O1                               | 104.09(10) | O1-Zn1-O2 <sup>ii</sup>                 | 124.96(9)  |
| N1-Zn2-O3                | 91.93(11)  | N2-Zn1-O4 <sup>iv</sup>               | 88.20(11)  | N3-Zn1-O1 <sup>w</sup>                  | 92.00(10)  | O1-Zn1-O3 <sup>v</sup>                  | 116.09(11) |
| N1-Zn2-O7                | 174.60(12) | O1-Zn1-O1 <sup>i</sup>                | 82.21(10)  | N3-Zn1-O7 <sup>iii</sup>                | 89.89(10)  | O1-Zn1-O6 <sup>vi</sup>                 | 86.74(11)  |
| N1-Zn2-O7 <sup>v</sup>   | 96.01(11)  | O1-Zn1-O2                             | 86.10(10)  | O1-Zn1-O1 <sup>w</sup>                  | 92.14(9)   | O2-Zn1-O2 <sup>ii</sup>                 | 70.64(11)  |
| N2-Zn2-O1                | 81.16(12)  | O1-Zn1-O4 <sup>iv</sup>               | 93.15(10)  | O1-Zn1-O7 <sup>iii</sup>                | 90.00(8)   | O2-Zn1-O3 <sup>v</sup>                  | 117.51(11) |
| N2-Zn2-O3                | 166.78(12) | O1 <sup>i</sup> -Zn1-O2               | 166.22(10) | O1 <sup>w</sup> -Zn1-O7 <sup>iii</sup>  | 176.72(9)  | O2-Zn1-O6 <sup>vi</sup>                 | 139.08(11) |
| N2-Zn2-O7                | 98.22(12)  | O1 <sup>i</sup> -Zn1-O4 <sup>iv</sup> | 84.18(10)  | O1-Zn2-O2                               | 105.71(9)  | O3 <sup>v</sup> -Zn1-O6 <sup>vi</sup>   | 92.78(11)  |
| N2-Zn2-O7 <sup>v</sup>   | 104.21(12) | O2-Zn1-O4 <sup>iv</sup>               | 103.80(10) | O1-Zn2-O4 <sup>iv</sup>                 | 118.88(9)  | O1-Zn2-O4 <sup>v</sup>                  | 89.10(11)  |
| O1-Zn2-O3                | 90.14(11)  | O1-Zn2-O3                             | 113.38(10) | O1-Zn2-O6 <sup>iii</sup>                | 110.32(9)  | O1-Zn2-O4 <sup>vii</sup>                | 90.90(11)  |
| O1-Zn2-O7                | 95.43(10)  | O1-Zn2-O5 <sup>iv</sup>               | 110.66(11) | O2-Zn2-O4 <sup>iv</sup>                 | 115.96(9)  | O1-Zn2-O5 <sup>ix</sup>                 | 87.31(10)  |
| O1-Zn2-O7 <sup>v</sup>   | 174.00(10) | O1-Zn2-O7 <sup>v</sup>                | 110.65(12) | O2-Zn2-O6 <sup>iii</sup>                | 97.11(9)   | O1 <sup>viii</sup> -Zn2-O4 <sup>v</sup> | 90.89(11)  |
| O3-Zn2-O7                | 92.47(10)  | O3-Zn2-O5 <sup>iv</sup>               | 89.97(11)  | O4 <sup>iv</sup> -Zn2-O6 <sup>iii</sup> | 106.69(10) | O1 <sup>v</sup> -Zn2-O5 <sup>vi</sup>   | 87.31(10)  |
| O3-Zn2-O7 <sup>v</sup>   | 85.02(11)  | O3-Zn2-O7 <sup>v</sup>                | 122.95(12) |                                         |            | O4 <sup>v</sup> -Zn2-O5 <sup>vi</sup>   | 94.07(12)  |

| 5                                        |            | 6                                      |            | 7                                        |            | 8                        |            |
|------------------------------------------|------------|----------------------------------------|------------|------------------------------------------|------------|--------------------------|------------|
| Cd1-O1                                   | 2.246(3)   | Cd1-O4 <sup>ii</sup>                   | 2.185(3)   | Cd1-O1                                   | 2.222(3)   | Cd1-O1                   | 2.224(3)   |
| Cd1-O5 <sup>iv</sup>                     | 2.290(3)   | Cd1-O2 <sup>iii</sup>                  | 2.275(4)   | Cd1-N1                                   | 2.243(3)   | Cd1-O3 <sup>ii</sup>     | 2.165(3)   |
| Cd1-O11 <sup>i</sup>                     | 2.207(4)   | Cd1-N1                                 | 2.327(4)   | Cd1-O3 <sup>ii</sup>                     | 2.279(3)   | Cd1-O6 <sup>vi</sup>     | 2.271(3)   |
| Cd2-O1W                                  | 2.319(4)   | Cd1-O7 <sup>iv</sup>                   | 2.384(4)   | Cd1-O4 <sup>iii</sup>                    | 2.400(3)   | Cd2-O1                   | 2.360(3)   |
| Cd2-O3                                   | 2.373(3)   | Cd1-O2                                 | 2.505(3)   | Cd1-O4 <sup>iv</sup>                     | 2.414(2)   | Cd2-O2                   | 2.416(3)   |
| Cd2-O4                                   | 2.406(3)   | Cd1-O6 <sup>iv</sup>                   | 2.512(3)   | Cd1-O5 <sup>v</sup>                      | 2.533(3)   | Cd2-N1                   | 2.302(4)   |
| Cd2-O7                                   | 2.258(3)   | Cd1-O3                                 | 2.525(3)   | Cd2-O6 <sup>iii</sup>                    | 2.204(2)   | Cd2-N2                   | 2.246(4)   |
| Cd2-O9 <sup>vi</sup>                     | 2.158(3)   | Cd2-O7 <sup>iv</sup>                   | 2.203(4)   | Cd2-O2                                   | 2.248(3)   | Cd2-O4 <sup>iii</sup>    | 2.174(3)   |
| Cd2-O13                                  | 2.257(4)   | Cd2-O5 <sup>ii</sup>                   | 2.204(4)   | Cd2-O3 <sup>vii</sup>                    | 2.379(2)   | Cd1-O5 <sup>vi</sup>     | 2.279(3)   |
| O1-Cd1-O5 <sup>iv</sup>                  | 89.64(11)  | Cd2-O3                                 | 2.336(3)   | Cd2-O3 <sup>iii</sup>                    | 2.379(2)   | Cd2-O6 <sup>vi</sup>     | 2.526(3)   |
| O1-Cd1-O11 <sup>i</sup>                  | 173.43(13) | N1-Cd1-O2                              | 103.90(16) | N1-Cd1-O1                                | 138.34(13) | O1-Cd1-O1 <sup>iv</sup>  | 180.00(15) |
| O1 <sup>iii</sup> -Cd1-O11 <sup>ii</sup> | 82.14(11)  | N1-Cd1-O2 <sup>iii</sup>               | 92.71(14)  | N1-Cd1-O6 <sup>iii</sup>                 | 91.93(12)  | O1-Cd1-O3 <sup>ii</sup>  | 85.55(10)  |
| O1 <sup>iii</sup> -Cd1-O5 <sup>v</sup>   | 89.64(11)  | N1-Cd1-O4 <sup>ii</sup>                | 171.56(15) | O1-Cd1-O6                                | 84.64(11)  | O1-Cd1-O6 <sup>v</sup>   | 100.84(11) |
| O5 <sup>iv</sup> -Cd1-O5 <sup>v</sup>    | 173.53(17) | N1-Cd1-O7 <sup>iv</sup>                | 84.76(15)  | O1-Cd1-O3 <sup>iii</sup>                 | 119.40(10) | O1-Cd2-O2                | 54.58(10)  |
| O1W-Cd2-O7                               | 80.63(13)  | O2-Cd1-O4 <sup>ii</sup>                | 84.39(12)  | O3 <sup>iii</sup> -Cd1-O6 <sup>ii</sup>  | 86.26(10)  | N1-Cd2-O1                | 157.81(12) |
| O1W-Cd2-O9 <sup>vi</sup>                 | 143.14(14) | O2-Cd1-O2 <sup>iii</sup>               | 79.92(12)  | N1-Cd1-O3 <sup>iii</sup>                 | 101.83(12) | N1-Cd2-O2                | 147.32(12) |
| O1W-Cd2-O13                              | 98.69(14)  | O3-Cd1-O4 <sup>ii</sup>                | 98.80(11)  | N1-Cd1-O4 <sup>iii</sup>                 | 91.61(11)  | N2-Cd2-O1                | 131.05(12) |
| O3-Cd2-O7                                | 90.81(11)  | O2 <sup>iii</sup> -Cd1-O3              | 129.67(12) | O3 <sup>iii</sup> -Cd1-O4 <sup>iii</sup> | 52.83(9)   | N2-Cd2-O2                | 86.31(13)  |
| O3-Cd2-O13                               | 156.15(13) | O2-Cd1-O3                              | 51.47(11)  | O2-Cd2-O5 <sup>v</sup>                   | 86.79(11)  | N1-Cd2-N2                | 67.80(14)  |
| O4-Cd2-O7                                | 132.22(10) | O3-Cd2-O5 <sup>v</sup>                 | 79.72(12)  | O2-Cd2-O5 <sup>ii</sup>                  | 93.21(11)  | O1-Cd2-O4 <sup>iii</sup> | 95.10(11)  |
| O3-Cd2-O4                                | 54.73(11)  | O3 <sup>i</sup> -Cd2-O5 <sup>i</sup>   | 100.28(12) | O2-Cd2-O2 <sup>vi</sup>                  | 180.0      | O1-Cd2-O5 <sup>vi</sup>  | 80.65(10)  |
| O1W-Cd2-O4                               | 73.97(12)  | O3 <sup>i</sup> -Cd2-O7 <sup>v</sup>   | 87.43(13)  | O3 <sup>vii</sup> -Cd2-O5 <sup>v</sup>   | 93.27(9)   | O2-Cd2-O4 <sup>iii</sup> | 93.94 (12) |
| O1W-Cd2-O3                               | 98.09(12)  | O5 <sup>ii</sup> -Cd2-O7 <sup>iv</sup> | 92.57(13)  | O3 <sup>vii</sup> -Cd2-O5 <sup>ii</sup>  | 86.73(9)   | O2-Cd2-O5 <sup>vi</sup>  | 115.45(10) |
| O4-Cd2-O9 <sup>vi</sup>                  | 90.32(12)  | O5 <sup>ii</sup> -Cd2-O7 <sup>v</sup>  | 91.52(14)  | O5 <sup>ii</sup> -Cd2-O5 <sup>v</sup>    | 180.0(2)   | O2-Cd2-O6 <sup>vi</sup>  | 126.10(10) |

Symmetry codes for **1**: (v)  $-x + 1, -y, -z + 1$ ; (vi)  $x, y - 1, z$ . **2**: (i)  $-x, -y, -z$ ; (iv)  $x, -y + 1/2, z - 1/2$ ; (v)  $x, y - 1, z$ . **3**: (iii)  $x - 1, y, z$ ; (iv)  $-x + 1, y - 1/2, -z + 3/2$ . **4**: (ii)  $-x + 1, -y, -z$ ; (v)  $x, y, z - 1$ ; (vi)  $x, y - 1, z - 1$ ; (vii)  $-x + 2, -y, -z + 1$ ; (viii)  $-x + 2, -y, -z$ ; (ix)  $-x + 2, -y + 1, -z + 1$ . **5**: (i)  $-x, -y + 2, -z + 1$ ; (ii)  $x + 1/2, -y + 2, z - 1/2$ ; (iii)  $-x + 1/2, y, -z + 1/2$ ; (iv)  $x - 1/2, -y + 2, z + 1/2$ ; (v)  $-x + 1, -y + 2, -z$ ; (vi)  $x + 1/2, -y + 1, z - 1/2$ . **6**: (i)  $-x + 3/2, y, -z + 1/2$ ; (ii)  $x + 1, y, z$ ; (iii)  $-x + 2, -y + 1, -z + 1$ ; (iv)  $x + 1/2, -y, z - 1/2$ ; (v)  $-x + 3/2, y, -z + 3/2$ . **7**: (ii)  $x, y - 1, z$ ; (iii)  $x, y, z - 1$ ; (iv)  $-x + 1, -y, -z + 1$ ; (v)  $-x, -y + 1, -z$ ; (vi)  $-x, -y, -z$ ; (vii)  $-x, -y, -z + 1$ . **8**: (i)  $x, y - 1, z$ ; (ii)  $-x, -y + 2, -z + 1$ ; (iii)  $x + 1, y, z$ ; (iv)  $-x + 1, -y + 2, -z + 1$ ; (v)  $-x + 1, -y + 1, -z + 1$ ; (vi)  $x, y + 1, z$ .

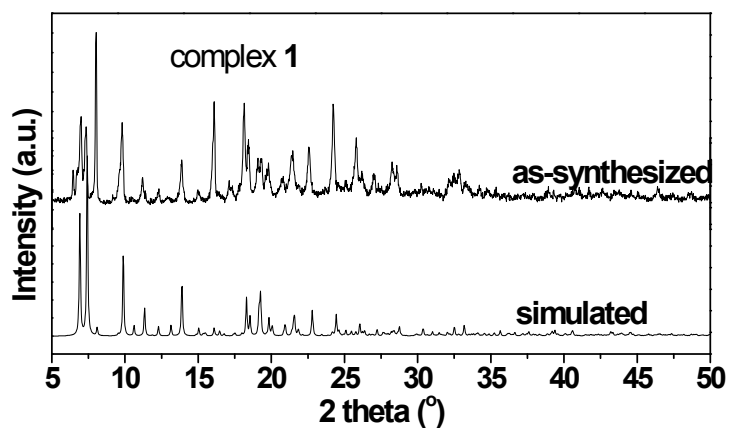

**Fig. S1** Powder XRD patterns of as-synthesized and simulated from single-crystal diffraction data of **1**.

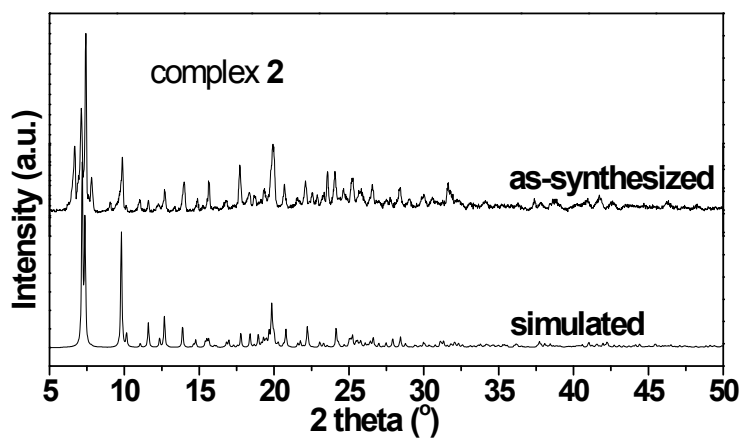

**Fig. S2** Powder XRD patterns of as-synthesized and simulated from single-crystal diffraction data of **2**.

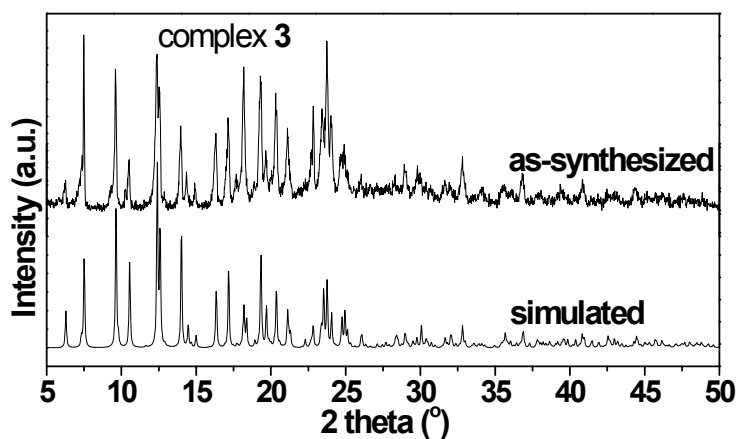

**Fig. S3** Powder XRD patterns of as-synthesized and simulated from single-crystal diffraction data of **3**.

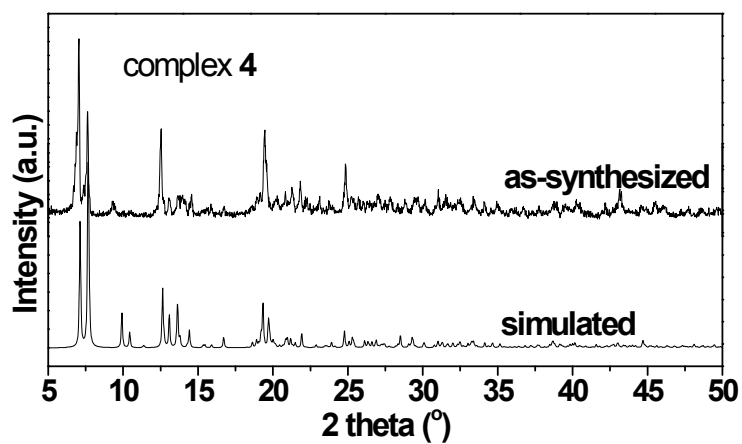

**Fig. S4** Powder XRD patterns of as-synthesized and simulated from single-crystal diffraction data of 4.

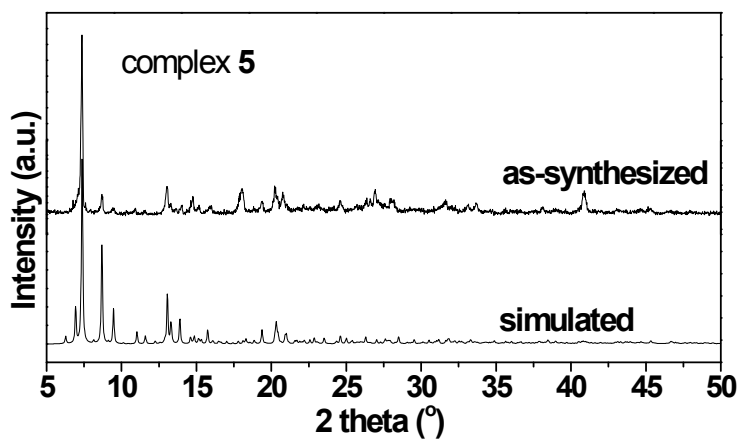

**Fig. S5** Powder XRD patterns of as-synthesized and simulated from single-crystal diffraction data of 5.

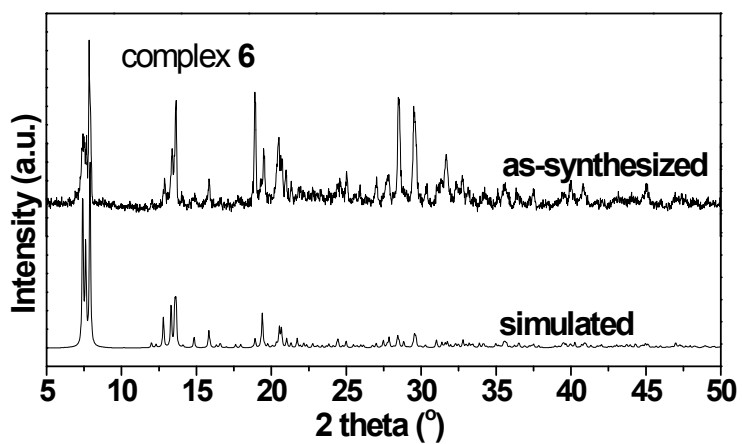

**Fig. S6** Powder XRD patterns of as-synthesized and simulated from single-crystal diffraction data of 6.

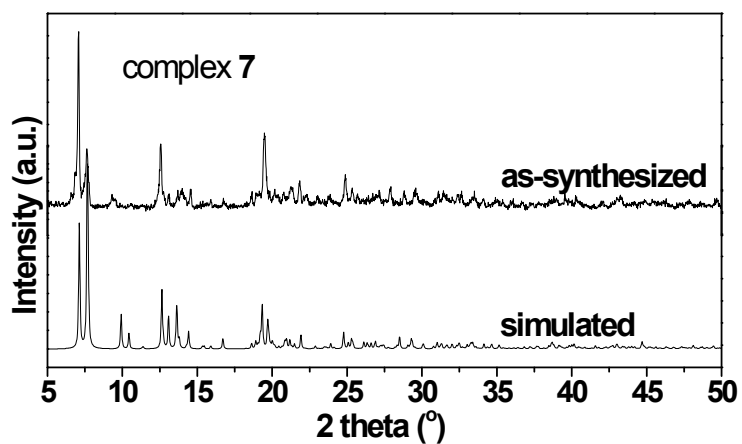

Fig. S7 Powder XRD patterns of as-synthesized and simulated from single-crystal diffraction data of 7.

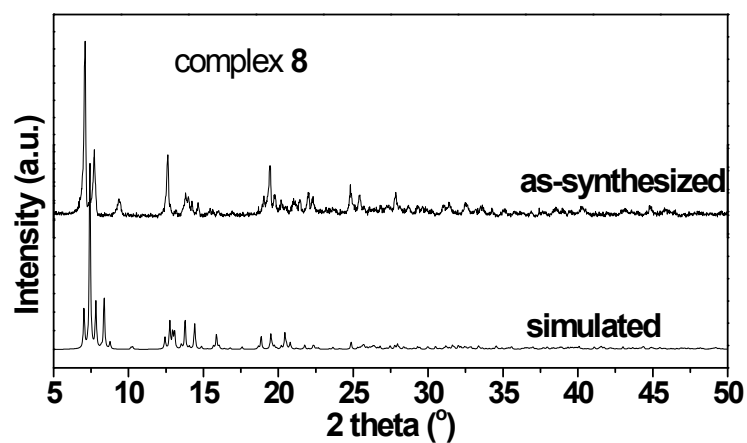

Fig. S8 Powder XRD patterns of as-synthesized and simulated from single-crystal diffraction data of 8.

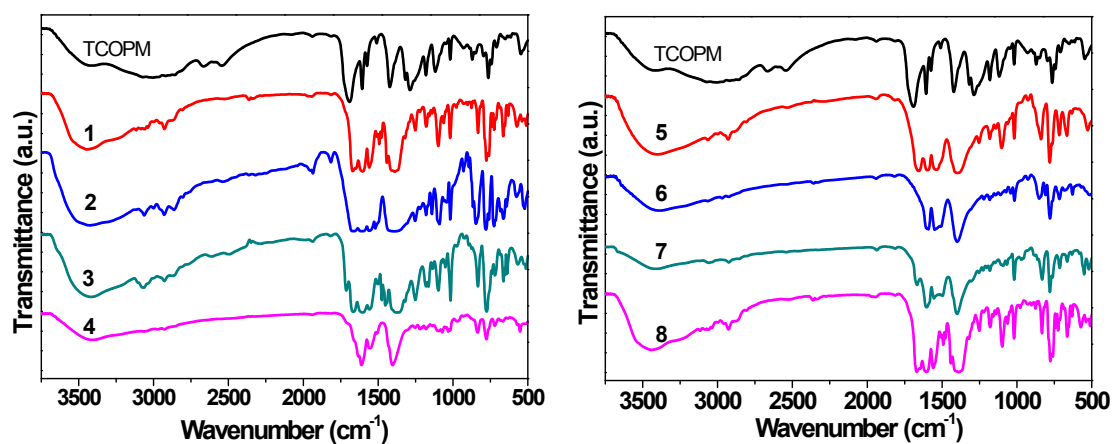

Fig. S9 FT-IR spectra of 1-8 and the free TCOPM ligand.

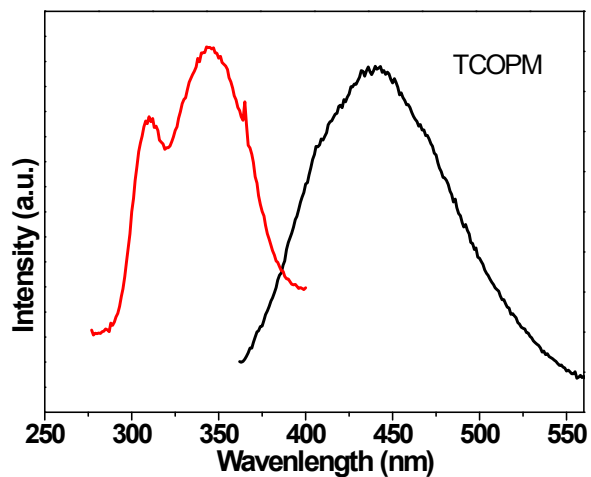

**Fig. S10** Solid-state, room-temperature photoemission (excitation wavelength  $\lambda_{\text{ex}} = 344$  nm, and emission wavelength  $\lambda_{\text{em}} = 446$  nm) spectra for the free TCOPM.

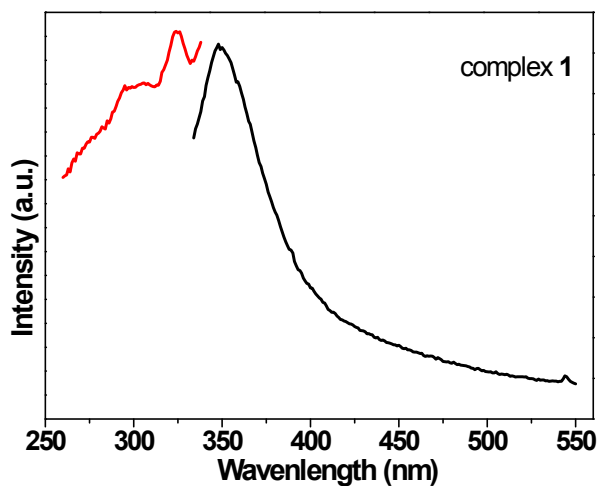

**Fig. S11** Solid-state, room-temperature photoemission (excitation wavelength  $\lambda_{\text{ex}} = 324$  nm, and emission wavelength  $\lambda_{\text{em}} = 348$  nm) spectra for **1**.



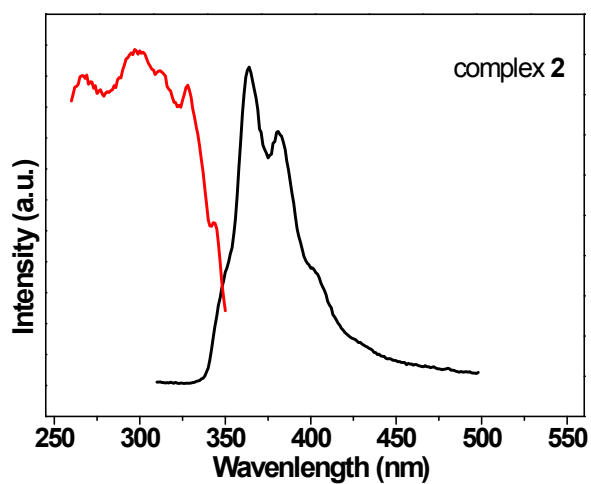

**Figure S12.** Solid-state, room-temperature photoemission (excitation wavelength  $\lambda_{\text{ex}}$  = 270 nm, and emission wavelength  $\lambda_{\text{em}}$  = 364 nm) spectra for **2**.

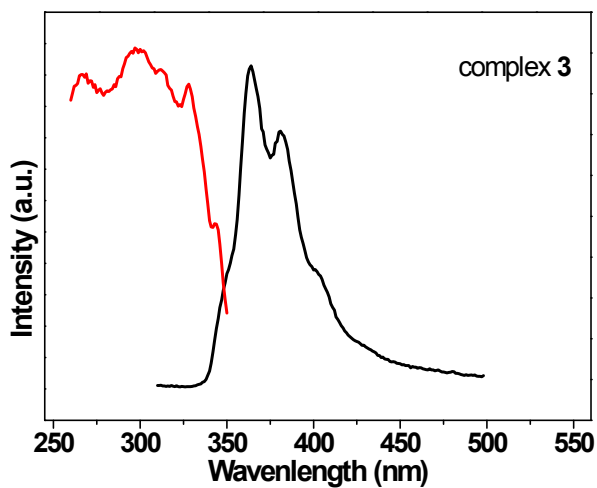

**Figure S13.** Solid-state, room-temperature photoemission (excitation wavelength  $\lambda_{\text{ex}}$  = 298 nm, and emission wavelength  $\lambda_{\text{em}}$  = 357 nm) spectra for **3**.

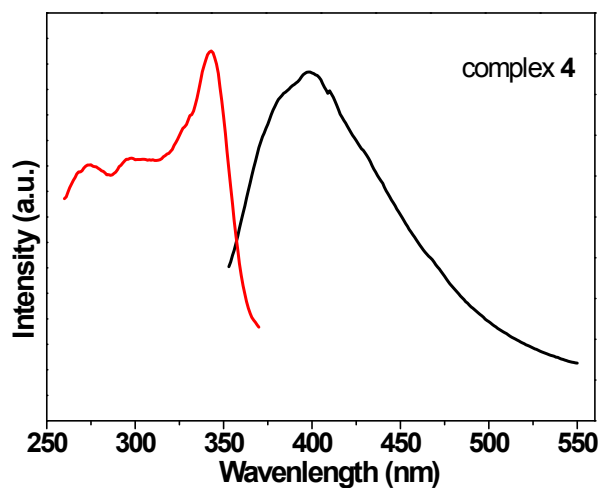

**Figure S14.** Solid-state, room-temperature photoemission (excitation wavelength  $\lambda_{\text{ex}}$  = 343 nm and emission wavelength  $\lambda_{\text{em}}$  = 398 nm) spectra for 4.

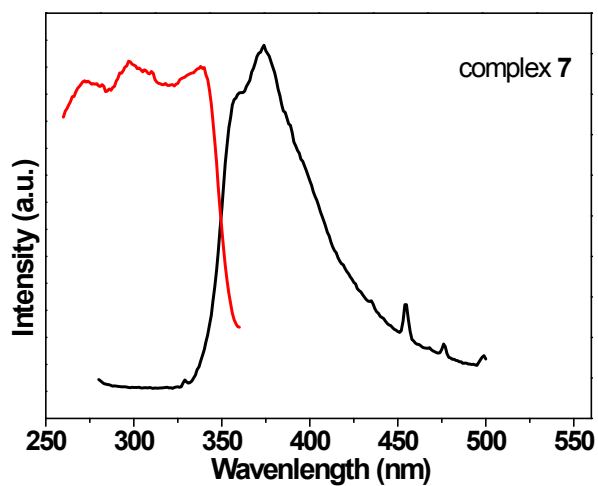

**Figure S15.** Solid-state, room-temperature photoemission (excitation wavelength  $\lambda_{\text{ex}}$  = 270 nm and emission wavelength  $\lambda_{\text{em}}$  = 374 nm) spectra for 7.

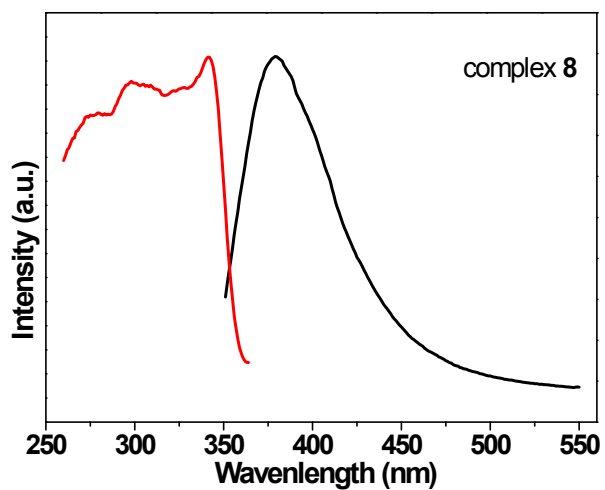

**Figure S16.** Solid-state, room-temperature photoemission (excitation wavelength,  $\lambda_{\text{ex}}$  = 341 nm and emission wavelength  $\lambda_{\text{em}}$  = 378 nm) spectra for **8**.

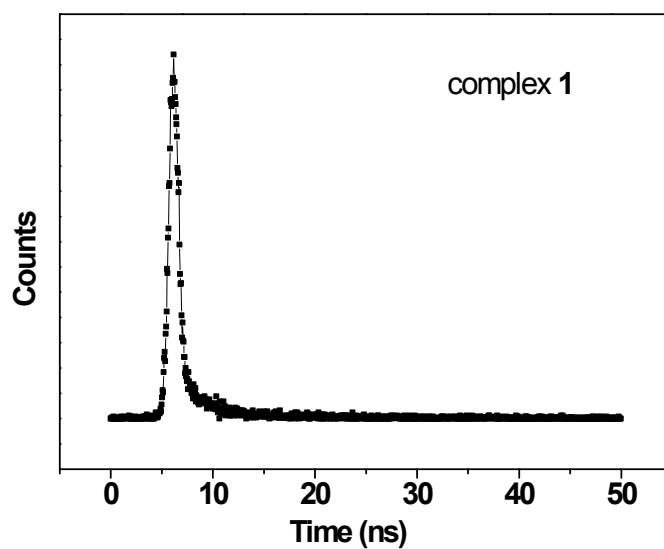

**Figure S17.** The emission decay lifetime of **1**.

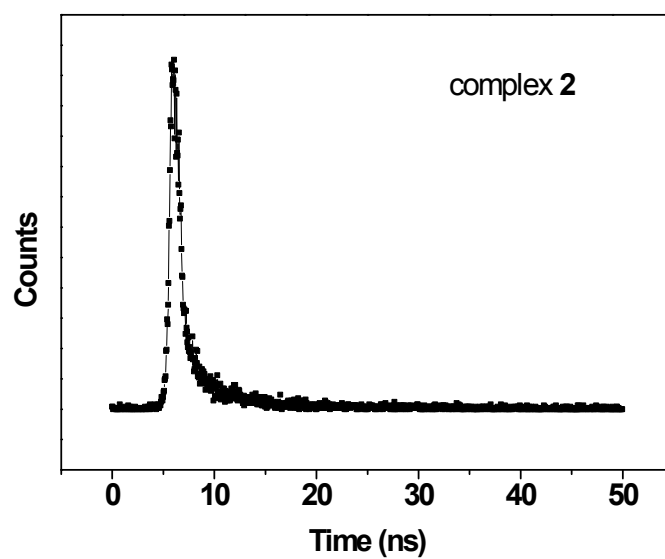

**Figure S18.** The emission decay lifetime of **2**.

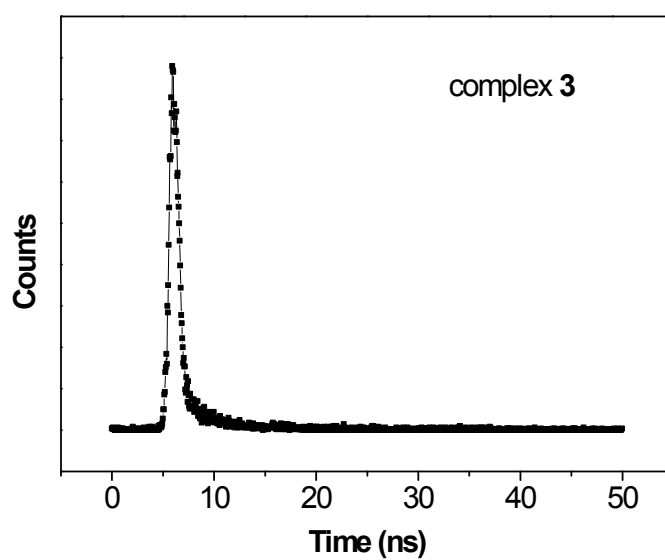

**Figure S19.** The emission decay lifetime of **3**.

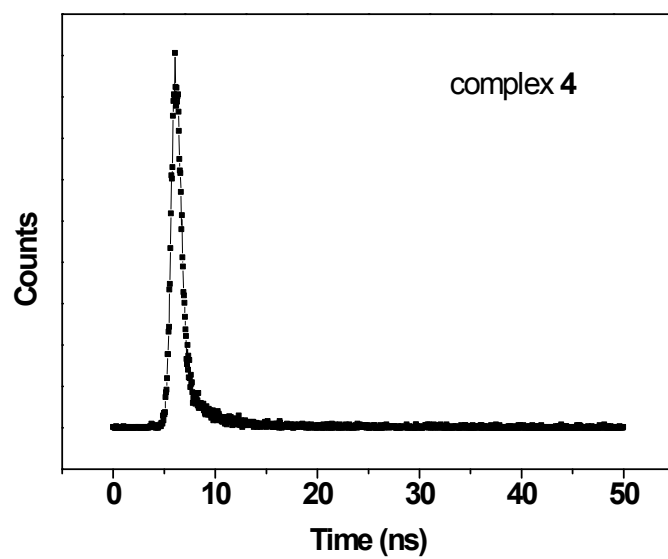

**Figure S20.** The emission decay lifetime of 4.

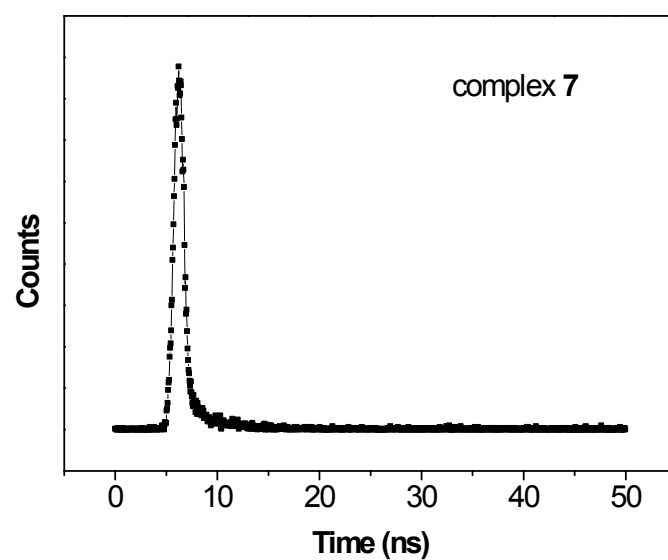

**Figure S21.** The emission decay lifetime of 7.

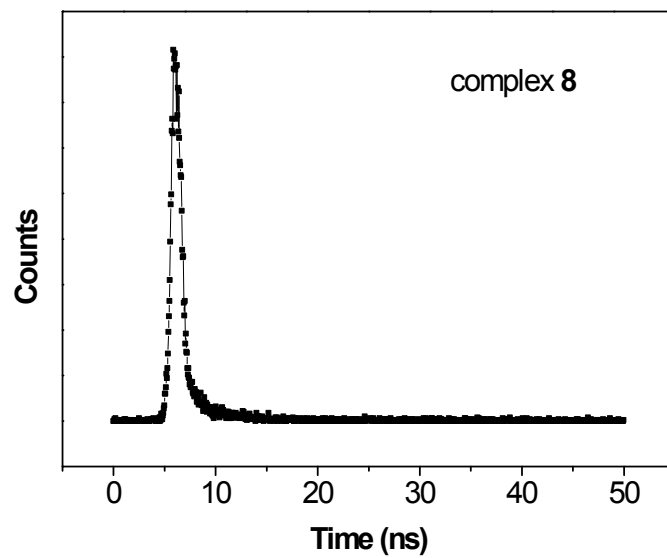

**Figure S22.** The emission decay lifetime of **8**.
